# Supplementary material for: Fucoidan from Laminaria japonica Ameliorates Type 2 Diabetes Mellitus in Association with Modulation of Gut Microbiota and Metabolites in Streptozocin-Treated Mice
Source: Foods. 2022 Dec 22;12(1):33. doi: 10.3390/foods12010033 (PMC9818518; doi:10.3390/foods12010033)

Table S1

| Protein (%) | Uronic acid (%) | Sulfate group (%) | Total sugar (%) | Molecular weight |
|-------------|-----------------|-------------------|-----------------|------------------|
| 3.70 ± 0.5  | 17.90 ± 0.7     | 19.53 ± 0.4       | 68.8 ± 0.4      | 89 kDa           |

Protein was quantified through the Bradford method with BSA as standard. Total sugar and uronic acid content were determined by using the phenol-sulfuric acid method and meta-hydroxydiphenyl-sulfuric acid method respectively (doi:10.1016/j.carbpol.2010.12.033). The level of sulfate group was measured through the barium chloride-gelatin method using K<sub>2</sub>SO<sub>4</sub> as standard (doi: 10.1042/bj0840106).

2.0 mg of LJF dissolved in 1.0 mL of 100 mM ammonium acetate solution. After vortex oscillation, the solution passed 0.22 µm hole membrane filter filtration (JINTENG, Tianjin, China). Relative molecular weight of LJF was determined by high-performance gel permeation chromatography (HPGPC) using a Waters Alliance 2695 HPLC (Milford, MA, USA) system equipped with a Waters Alliance 2414 refractive index detector and analytical column of TSK-G2500PWXL (7.8 × 300 mm, Tosoh Corporation, Tokyo, Japan) at 30°C. The mobile phase was 100 mM ammonium acetate solution (pH 6.0) with a flow rate of 0.4 mL/min, and the injection volume was 10 µL. A standard curve was plotted with the value of average relative molecular weight on the retention time using Dextran (1, 5, 25, 50 and 150 kDa) as standard (doi:10.1016/j.foodres.2022.110980).

Figure S1

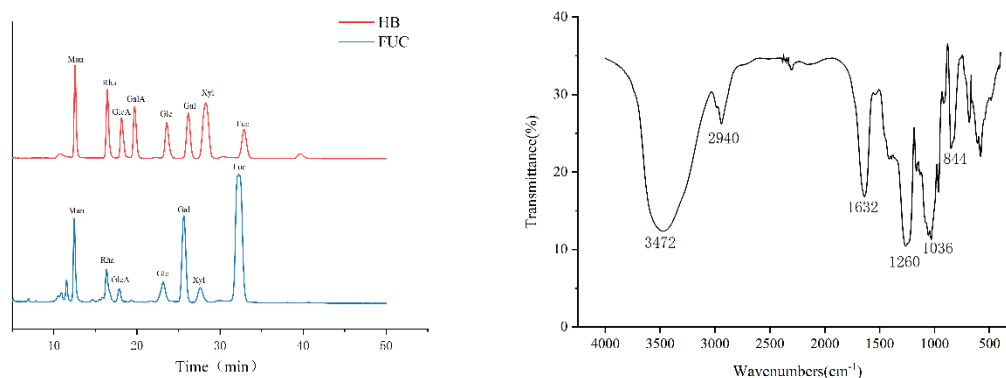

The monosaccharides composition of LJF was determined using high-performance liquid chromatography (HPLC) analysis of monosaccharide derivatives with 1-phenyl-3-methyl-5-pyrazolone in sample hydrolysates as previous study ( doi:10.1016/j.carbpol.2010.05.029).

The samples were ground with dried potassium bromide powder and pressed into 1 mm pellets for FT-IR spectrophotometer (Perkin Elmer, Waltham, MA, USA) measurements in the range of 400 ~ 4000 $\text{cm}^{-1}$  (doi:10.1016/j.foodres.2022.110980). The FT-IR spectrum of LJF was shown in Figure. A1 right. The absorption peaks at 3472 and 2940  $\text{cm}^{-1}$  were assigned to O-H and C-H stretching vibrations respectively. 1632 $\text{cm}^{-1}$  were contributed to the carboxyl group. The absorption peak at 1260 $\text{cm}^{-1}$  was considered as stretching vibration of S=O of sulfate group. The peaks between 1036 and 844 $\text{cm}^{-1}$  belonged to stretching vibrations of the C-O bond.

Figure S2

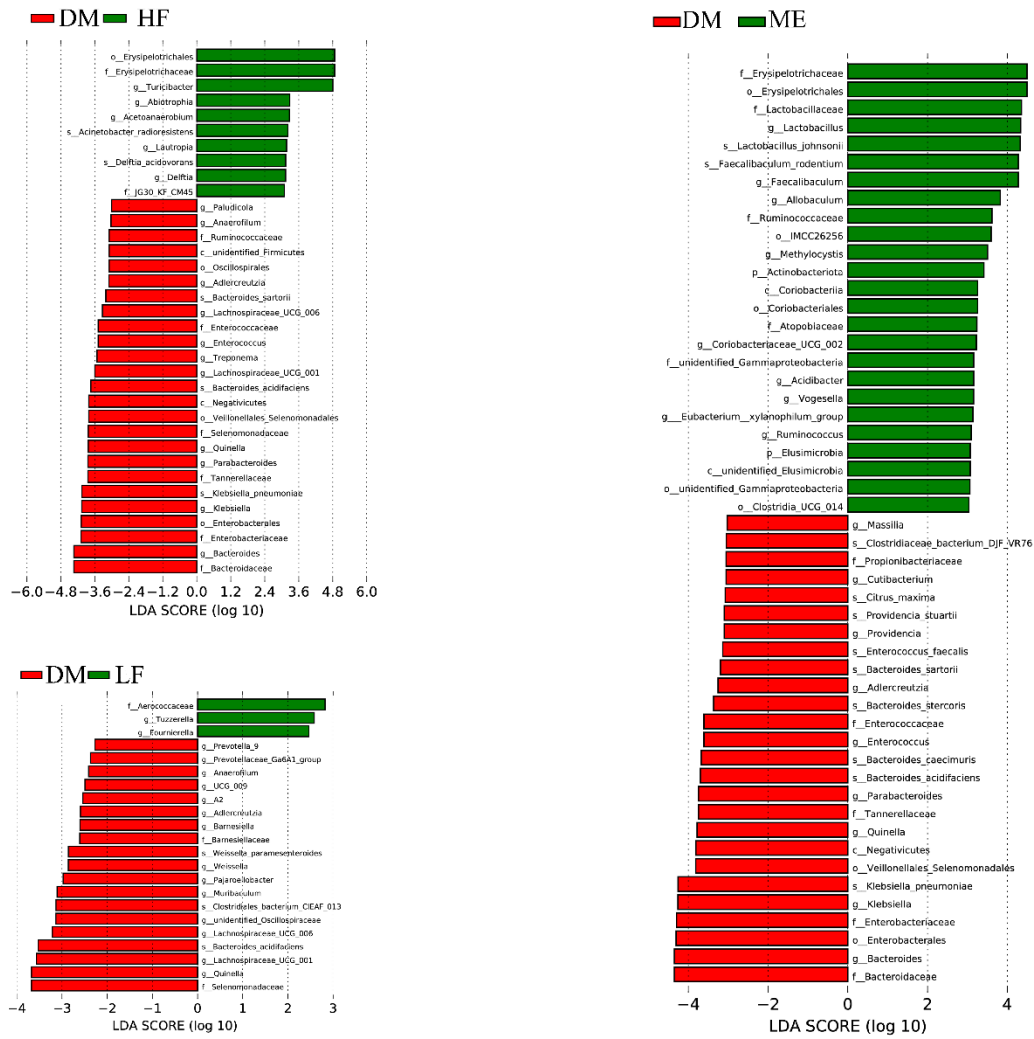

Figure S3

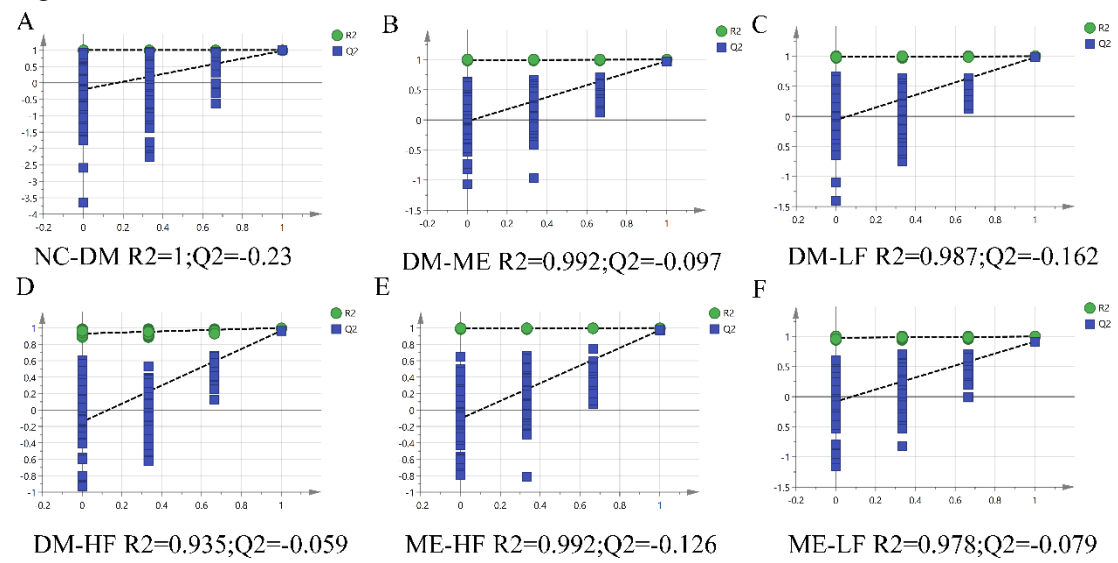

Figure S4

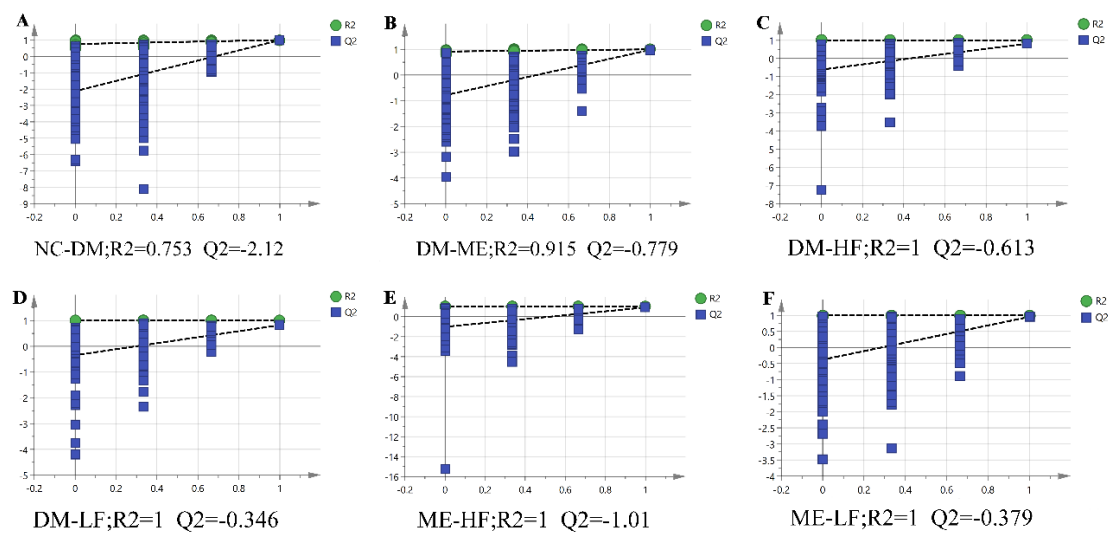

Supplement: Supplementary file 1 [file foods-12-00033-s001.zip › foods-2068864-supplementary.pdf]
